# Supplementary material for: Identification and Expression Analysis of the MADS-box Gene Family in Camellia sinensis
Source: Research Square preprint supplement (doi:10.21203/rs.3.rs-7855824/v1), 2025-12-04
Supplement: Supplementary file 1 [file 0bb6ab8803cb386b965b29ef.xlsx]

## Sheet: Sheet1
Primer Name	Forward primer（5’-3’）	Reverse primer（3’-5’）
Cas14G031860.1	GAAGAGAACAAGCAACTGAA	AGATGTGTCGGAGCAATC
Cas05G010120.1	GAACTGTGCGGTCTTGAG	TCTTCTTGTAGGTCTCTGTCT
Cas01G012140.1	GCTTATTGCCACTGATACTG	GCTGTTCCTTCTCCTTCTT
Cas10G020070.1	GCACTTGCTTGGAGAAGA	TCTGTCTGGAGCGATGAT
Cas13G024900.1	GGCATAATCTACAACCACAG	CCACGCATTCTCTTCCAT
CaS10G020060.1	AGTTGGAGAGGAGCGTAA	GGTGGTCCGATGAACAAT
Cas04G016390.1	AGACGCCGAGGTAATAGA	CTCCAACTGCTTCAATTCC
actin	GACTACCTACAACTCCATCAT	ATCCTCCAATCCAGACACT
